# Supplementary material for: Outcomes after Surgical Treatment of Oesophagogastric Cancer with Synchronous Liver Metastases: A Multicentre Retrospective Cohort Study
Source: MDPI journal article supplement (doi:10.3390/cancers16040797), 2024-02-16
Supplement: s1 [file s1]

## Supplement

**Table S1** Systemic treatment details stratified per histological subtype

| Type of treatment                            | <b>Neoadjuvant</b> | <b>Adjuvant</b> |
|----------------------------------------------|--------------------|-----------------|
|                                              | <i>n</i> = 26      | <i>n</i> = 14   |
| <i>Squamous cell carcinoma</i>               |                    |                 |
| <b>CRT (CROSS)</b>                           | 1 (4)              | 0 (0)           |
| <b>Chemotherapy</b>                          |                    |                 |
| Doublet (platinum based)                     | 2 (8)              | 1 (7)           |
| Triplet (anthracyclins)                      | 1 (4)              | 0 (0)           |
| <i>Adenocarcinoma</i>                        |                    |                 |
| <b>CRT (Doublet, platinum based + 45 Gy)</b> | 1 (4)              | 0 (0)           |
| <b>Chemotherapy</b>                          |                    |                 |
| Doublet (platinum based)                     | 9 (35)             | 5 (36)          |
| Triplet (anthracyclins)                      | 6 (23)             | 1 (7)           |
| FLOT                                         | 3 (12)             | 2 (14)          |
| <b>Chemotherapy + targeted therapy</b>       |                    |                 |
| Doublet (platinum based) + trastuzumab       | 1 (4)              | 2 (14)          |
| Monotherapy + trastuzumab                    | 1 (4)              | 1 (7)           |
| <b>Trastuzumab</b>                           | 0 (0)              | 1 (7)           |
| <b>Unknown</b>                               | 1 (4)              | 1 (7)           |

CRT Chemoradiotherapy Gy Gray
